# Supplementary material for: The impact of frailty on the outcomes of COVID-19 patients with persistent critical illness: A population-based cohort study
Source: bioRxiv or medRxiv preprint supplement (doi:10.1101/2023.07.17.23292714), 2023-07-18

**Supplementary Table 1:** Diagnostic codes and subcodes for patients included in the study between January 2020 and December 2021.

|                                                                                                                                                                                                                                                                                                                    | Diagnostic code in ANZICS-APD | Diagnostic subcode for patients without COVID-19 | Diagnostic subcode for patients with COVID-19* |
|--------------------------------------------------------------------------------------------------------------------------------------------------------------------------------------------------------------------------------------------------------------------------------------------------------------------|-------------------------------|--------------------------------------------------|------------------------------------------------|
| Viral pneumonia                                                                                                                                                                                                                                                                                                    | 213                           | 213.01                                           | 213.02                                         |
| ARDS                                                                                                                                                                                                                                                                                                               | 204                           | 204.01                                           | 204.22                                         |
| ANZICS – Australia New Zealand Intensive Care Society; APD – adult patient database; ARDS – acute respiratory distress syndrome<br>* The patients were considered highly likely to be positive for COVID-19 (“Suspected or confirmed pandemic infection”), as ANZICS does not have this information but infers it. |                               |                                                  |                                                |

**Supplementary Table 2:** Missing data comparison for patients with and without available CFS scores.

| Variable                                                                                                                                                                                                                                                                                                                              | Frailty data present (n=3064) | Missing frailty data (n=645) | p-value |
|---------------------------------------------------------------------------------------------------------------------------------------------------------------------------------------------------------------------------------------------------------------------------------------------------------------------------------------|-------------------------------|------------------------------|---------|
| PerCI, n (%)                                                                                                                                                                                                                                                                                                                          | 847 (27.6%)                   | 134 (20.9%)                  | <0.001  |
| Indigenous, n (%)                                                                                                                                                                                                                                                                                                                     | 78 (2.5%)                     | 10 (1.6%)                    | 0.32    |
| Male sex, n (%)                                                                                                                                                                                                                                                                                                                       | 1879 (56.2%)                  | 382 (59.6%)                  | 0.41    |
| Age (years) (median [IQR])                                                                                                                                                                                                                                                                                                            | 56.9 [44.7, 68.2]             | 59.0 [48.3, 69.9]            | 0.007   |
| <b>Hospital admission source, n (%)</b>                                                                                                                                                                                                                                                                                               |                               |                              |         |
| - Home                                                                                                                                                                                                                                                                                                                                | 2473 (80.7%)                  | 539 (84.1%)                  | 0.012   |
| - Other acute hospital (not ICU/ED)                                                                                                                                                                                                                                                                                                   | 129 (4.2%)                    | 16 (2.5%)                    |         |
| - Nursing home or chronic care                                                                                                                                                                                                                                                                                                        | 15 (0.5%)                     | 8 (1.2%)                     |         |
| - Other hospital ICU                                                                                                                                                                                                                                                                                                                  | 257 (8.4%)                    | 38 (5.9%)                    |         |
| - Other hospital Emergency department                                                                                                                                                                                                                                                                                                 | 151 (4.9%)                    | 28 (4.4%)                    |         |
| - Rehabilitation                                                                                                                                                                                                                                                                                                                      | 3 (0.1%)                      | 2 (0.3%)                     |         |
| <b>ICU admission source, n (%)</b>                                                                                                                                                                                                                                                                                                    |                               |                              |         |
| - Emergency department                                                                                                                                                                                                                                                                                                                | 1191 (38.9%)                  | 280 (43.7%)                  | <0.001  |
| - Ward                                                                                                                                                                                                                                                                                                                                | 1483 (48.4%)                  | 278 (43.4%)                  |         |
| - Other hospital                                                                                                                                                                                                                                                                                                                      | 103 (3.4%)                    | 33 (5.1%)                    |         |
| - Other hospital ICU                                                                                                                                                                                                                                                                                                                  | 272 (8.9%)                    | 36 (5.6%)                    |         |
| - Operating theatre / Recovery                                                                                                                                                                                                                                                                                                        | 1 (0.0%)                      | 0 (0)                        |         |
| - Direct admit                                                                                                                                                                                                                                                                                                                        | 14 (0.5%)                     | 14 (2.2%)                    |         |
| <b>Documented co-morbidities, n (%)</b>                                                                                                                                                                                                                                                                                               |                               |                              |         |
| - Chronic respiratory condition                                                                                                                                                                                                                                                                                                       | 200 (6.5%)                    | 15 (2.3%)                    | <0.001  |
| - Chronic cardiovascular condition                                                                                                                                                                                                                                                                                                    | 179 (5.8%)                    | 19 (3.0%)                    | 0.003   |
| - Chronic renal failure                                                                                                                                                                                                                                                                                                               | 74 (2.4%)                     | 6 (0.9%)                     | 0.019   |
| - Chronic liver disease                                                                                                                                                                                                                                                                                                               | 21 (0.7%)                     | 6 (0.9%)                     | 0.50    |
| - Diabetes mellitus                                                                                                                                                                                                                                                                                                                   | 911 (29.7%)                   | 89 (13.9%)                   | <0.001  |
| - Immune suppressive therapy                                                                                                                                                                                                                                                                                                          | 142 (4.6%)                    | 27 (4.2%)                    | 0.64    |
| - Lymphoma                                                                                                                                                                                                                                                                                                                            | 13 (0.4%)                     | 1 (0.2%)                     | 0.31    |
| - Leukaemia                                                                                                                                                                                                                                                                                                                           | 26 (0.8%)                     | 6 (0.9%)                     | 0.83    |
| - Metastatic cancer                                                                                                                                                                                                                                                                                                                   | 24 (0.8%)                     | 4 (0.6%)                     | 0.67    |
| - Delirium, n (%)                                                                                                                                                                                                                                                                                                                     | 259 (8.5%)                    | 8 (1.2%)                     | <0.001  |
| <b>Organ failure score</b>                                                                                                                                                                                                                                                                                                            |                               |                              |         |
| - APACHE III score (mean [SD])                                                                                                                                                                                                                                                                                                        | 50.0 [20.0]                   | 50.4 [21.7]                  | 0.47    |
| - ANZROD (%) (mean [SD])                                                                                                                                                                                                                                                                                                              | 9.5 [12.2]                    | 10.1 [12.1]                  | 0.61    |
| ICU admission post MET call, n (%)                                                                                                                                                                                                                                                                                                    | 1105 (36.3%)                  | 182 (28.4%)                  | <0.001  |
| Cardiac arrest, n (%)                                                                                                                                                                                                                                                                                                                 | 6 (0.2%)                      | 0 (0)                        | 0.004   |
| Treatment limitation, n (%)                                                                                                                                                                                                                                                                                                           | 255 (8.4%)                    | 55 (8.6%)                    | 0.40    |
| Pre-ICU (days) (median [IQR])                                                                                                                                                                                                                                                                                                         | 12.4 [4.0, 56.8]              | 9.5 [3.7, 63.6]              | 0.31    |
| <b>ICU supports</b>                                                                                                                                                                                                                                                                                                                   |                               |                              |         |
| Mechanical ventilation (MV), n (%)                                                                                                                                                                                                                                                                                                    | 1306 (43.1%)                  | 195 (32.0%)                  | <0.001  |
| Non-invasive ventilation (NIV), n (%)                                                                                                                                                                                                                                                                                                 | 1260 (41.8%)                  | 203 (33.4%)                  | <0.001  |
| Vasopressor and inotropes, n (%)                                                                                                                                                                                                                                                                                                      | 1188 (39.2%)                  | 200 (32.8%)                  | 0.003   |
| Renal replacement therapy, n (%)                                                                                                                                                                                                                                                                                                      | 180 (6.0%)                    | 33 (5.5%)                    | 0.63    |
| ECMO, n (%)                                                                                                                                                                                                                                                                                                                           | 104 (3.5%)                    | 9 (1.5%)                     | 0.011   |
| Tracheostomy, n (%)                                                                                                                                                                                                                                                                                                                   | 186 (6.2%)                    | 13 (2.2%)                    | <0.001  |
| CFS – clinical frailty scale, SD – standard deviation, IQR – interquartile range, MET – medical emergency team, APACHE - Acute Physiology and Chronic Health Evaluation, ED – emergency department, ICU – intensive care unit, ROD – risk of death, ANZROD – Australia New Zealand risk of death, PerCI - Persistent critical illness |                               |                              |         |

**Supplementary Table 3a: Baseline characteristics of patients with and without Persistent critical illness (PerCI), for clinical frailty scale (CFS) categories CFS-1-2 and CFS-3-4.**

| Variable                                                                                                                                                                                                                                                                                                                                       | CFS-1-2 (n=1123)               |                             |                  | CFS-3-4 (n=1575)                |                             |                  |
|------------------------------------------------------------------------------------------------------------------------------------------------------------------------------------------------------------------------------------------------------------------------------------------------------------------------------------------------|--------------------------------|-----------------------------|------------------|---------------------------------|-----------------------------|------------------|
|                                                                                                                                                                                                                                                                                                                                                | Patients without PerCI (n=835) | Patients with PerCI (n=288) | p-value          | Patients without PerCI (n=1109) | Patients with PerCI (n=466) | p-value          |
| Male sex, n (%)                                                                                                                                                                                                                                                                                                                                | 523 (62.6%)                    | 203 (70.5%)                 | <b>0.012</b>     | 656 (59.2%)                     | 295 (63.3%)                 | 0.12             |
| Indigenous status, n (%)                                                                                                                                                                                                                                                                                                                       | 24 (2.9%)                      | 8 (2.8%)                    | 0.92             | 32 (2.9%)                       | 9 (1.9%)                    | 0.46             |
| Age, (years), median (IQR)                                                                                                                                                                                                                                                                                                                     | 46.5 (34.1, 56.6)              | 54.0 (43.5, 63.9)           | <b>&lt;0.001</b> | 59.1 (47.5, 69.3)               | 61.7 (51.7, 69.8)           | <b>0.010</b>     |
| <b>Hospital admission source, n (%)</b>                                                                                                                                                                                                                                                                                                        |                                |                             |                  |                                 |                             |                  |
| - Home                                                                                                                                                                                                                                                                                                                                         | 715 (85.6%)                    | 191 (66.3%)                 | <b>&lt;0.001</b> | 950 (85.7%)                     | 337 (72.3%)                 | <b>&lt;0.001</b> |
| - Other acute hospital                                                                                                                                                                                                                                                                                                                         | 103 (12.4%)                    | 90 (31.3%)                  |                  | 148 (13.3%)                     | 126 (26.9%)                 |                  |
| - Nursing home or chronic care                                                                                                                                                                                                                                                                                                                 | 0 (0)                          | 1 (0.3%)                    |                  | 1 (0.1%)                        | 0 (0)                       |                  |
| - Rehabilitation                                                                                                                                                                                                                                                                                                                               | 0 (0)                          | 0 (0)                       |                  | 2 (0.2%)                        | 0 (0)                       |                  |
| - Missing                                                                                                                                                                                                                                                                                                                                      | 17 (2.0%)                      | 6 (2.1%)                    |                  | 8 (0.7%)                        | 4 (0.9%)                    |                  |
| <b>ICU admission source, n (%)</b>                                                                                                                                                                                                                                                                                                             |                                |                             |                  |                                 |                             |                  |
| - Emergency department (ED)                                                                                                                                                                                                                                                                                                                    | 355 (42.5%)                    | 93 (32.3%)                  | <b>&lt;0.001</b> | 459 (41.4%)                     | 138 (29.6%)                 | <b>&lt;0.001</b> |
| - Ward                                                                                                                                                                                                                                                                                                                                         | 411 (49.2%)                    | 116 (40.3%)                 |                  | 340 (45.1%)                     | 40 (43.0%)                  |                  |
| - Other hospital (ED and ICU)                                                                                                                                                                                                                                                                                                                  | 62 (7.4%)                      | 77 (26.7%)                  |                  | 179 (23.7%)                     | 30 (32.3%)                  |                  |
| - Operating theatre / Recovery                                                                                                                                                                                                                                                                                                                 | 1 (0.1%)                       | 0 (0)                       |                  | 0 (0)                           | 0 (0)                       |                  |
| - Direct admit                                                                                                                                                                                                                                                                                                                                 | 6 (0.7%)                       | 2 (0.7%)                    |                  | 2 (0.2%)                        | 2 (0.4%)                    |                  |
| <b>Documented co-morbidities, n (%)</b>                                                                                                                                                                                                                                                                                                        |                                |                             |                  |                                 |                             |                  |
| - Chronic respiratory condition                                                                                                                                                                                                                                                                                                                | 25 (3.0%)                      | 7 (2.4%)                    | 0.62             | 72 (6.5%)                       | 17 (3.6%)                   | <b>&lt;0.001</b> |
| - Chronic CVS condition                                                                                                                                                                                                                                                                                                                        | 18 (2.2%)                      | 6 (2.1%)                    | 0.94             | 71 (6.4%)                       | 16 (3.4%)                   | <b>0.019</b>     |
| - Chronic renal failure                                                                                                                                                                                                                                                                                                                        | 3 (0.4%)                       | 1 (0.3%)                    | 0.98             | 30 (2.7%)                       | 10 (2.1%)                   | 0.52             |
| - Chronic liver disease                                                                                                                                                                                                                                                                                                                        | 0 (0)                          | 1 (0.3%)                    | 0.09             | 7 (0.6%)                        | 4 (0.9%)                    | 0.62             |
| - Diabetes mellitus                                                                                                                                                                                                                                                                                                                            | 138 (16.9%)                    | 63 (22.1%)                  | 0.05             | 375 (35.6%)                     | 181 (41.5%)                 | <b>0.031</b>     |
| - Immune suppressive therapy                                                                                                                                                                                                                                                                                                                   | 12 (1.4%)                      | 30 (11.0%)                  | 0.45             | 58 (5.2%)                       | 26 (5.6%)                   | 0.78             |
| - Lymphoma                                                                                                                                                                                                                                                                                                                                     | 0 (0)                          | 0 (0)                       | -                | 5 (0.5%)                        | 3 (0.6%)                    | 0.62             |
| - Leukaemia                                                                                                                                                                                                                                                                                                                                    | 1 (0.1%)                       | 1 (0.3%)                    | 0.43             | 8 (0.7%)                        | 5 (1.1%)                    | 0.48             |
| - Metastatic cancer                                                                                                                                                                                                                                                                                                                            | 2 (0.2%)                       | 0 (0)                       | 0.41             | 9 (0.8%)                        | 2 (0.4%)                    | 0.41             |
| - Obese (BMI $\geq$ 30 kg.m <sup>-2</sup> )                                                                                                                                                                                                                                                                                                    | 410 (49.1%)                    | 100 (34.7%)                 | <b>&lt;0.001</b> | 440 (39.7%)                     | 161 (34.5%)                 | 0.11             |
| - Delirium                                                                                                                                                                                                                                                                                                                                     | 16 (1.9%)                      | 44 (15.3%)                  | <b>&lt;0.001</b> | 279 (25.2%)                     | 124 (26.6%)                 | <b>&lt;0.001</b> |
| - Pregnancy status                                                                                                                                                                                                                                                                                                                             | 31 (3.7%)                      | 6 (2.1%)                    | <b>&lt;0.001</b> | 31 (2.8%)                       | 4 (0.9%)                    | <b>0.004</b>     |
| Pre-ICU (days) (median [IQR])                                                                                                                                                                                                                                                                                                                  | 13.6 (4.6, 54.4)               | 6.7 (0.9, 36.8)             | <b>&lt;0.001</b> | 13.5 (4.6, 59.3)                | 9.9 (1.6, 57.9)             | <b>0.004</b>     |
| ICU discharge delay, (median [IQR])                                                                                                                                                                                                                                                                                                            | 4.0 (2.2, 7.2)                 | 5.0 (2.9, 11.4)             | <b>&lt;0.001</b> | 4.0 (1.9, 7.1)                  | 4.5 (1.5, 8.2)              | 0.48             |
| <b>Organ failure scores</b>                                                                                                                                                                                                                                                                                                                    |                                |                             |                  |                                 |                             |                  |
| - APACHE III (mean [SD])                                                                                                                                                                                                                                                                                                                       | 39.6 (16.6)                    | 53.2 (18.4)                 | <b>&lt;0.001</b> | 49.9 (11.9)                     | 57.3 (18.1)                 | <b>&lt;0.001</b> |
| - ANZROD (%) (mean [SD])                                                                                                                                                                                                                                                                                                                       | 4.6 (6.0)                      | 9.1 (10.6)                  | <b>&lt;0.001</b> | 9.3 (11.9)                      | 11.1 (10.7)                 | <b>&lt;0.001</b> |
| ICU admission post MET call, n (%)                                                                                                                                                                                                                                                                                                             | 282 (34.0%)                    | 88 (30.9%)                  | 0.34             | 432 (39.3%)                     | 164 (35.5%)                 | 0.16             |
| Treatment limitations                                                                                                                                                                                                                                                                                                                          | 7 (0.8%)                       | 6 (2.1%)                    | 0.13             | 86 (7.8%)                       | 19 (4.1%)                   | <b>0.026</b>     |
| Cardiac arrest, n (%)                                                                                                                                                                                                                                                                                                                          | 0 (0)                          | 0 (0)                       | -                | 4 (0.4%)                        | 0 (0)                       | 0.39             |
| <b>ICU Supports, n (%)</b>                                                                                                                                                                                                                                                                                                                     |                                |                             |                  |                                 |                             |                  |
| Mechanical ventilation                                                                                                                                                                                                                                                                                                                         | 168/823 (20.4%)                | 247/286 (86.4%)             | <b>&lt;0.001</b> | 365/1097 (33.3%)                | 402/465 (86.5%)             | <b>&lt;0.001</b> |
| Non-invasive ventilation                                                                                                                                                                                                                                                                                                                       | 270/823 (32.8%)                | 111/282 (39.4%)             | <b>0.046</b>     | 476/1093 (43.5%)                | 234/461 (50.8%)             | <b>0.009</b>     |
| Vasopressor and inotropes                                                                                                                                                                                                                                                                                                                      | 130/824 (15.8%)                | 216/285 (75.8%)             | <b>&lt;0.001</b> | 339/1097 (30.9%)                | 369/464 (79.5%)             | <b>&lt;0.001</b> |
| Renal replacement therapy                                                                                                                                                                                                                                                                                                                      | 6/822 (0.7%)                   | 39/282 (13.8%)              | <b>&lt;0.001</b> | 29/1091 (2.7%)                  | 85/461 (18.4%)              | <b>&lt;0.001</b> |
| ECMO                                                                                                                                                                                                                                                                                                                                           | 6/822 (0.7%)                   | 45/282 (16.0%)              | <b>&lt;0.001</b> | 6/1092 (0.5%)                   | 45/461 (9.8%)               | <b>&lt;0.001</b> |
| Tracheostomy                                                                                                                                                                                                                                                                                                                                   | 3/822 (0.4%)                   | 55/281 (19.6%)              | <b>&lt;0.001</b> | 3/1090 (0.3%)                   | 111/458 (24.2%)             | <b>&lt;0.001</b> |
| CFS – clinical frailty scale, SD – standard deviation, IQR – interquartile range, BMI – body mass index, MET – medical emergency team, APACHE - Acute Physiology and Chronic Health Evaluation, ED – emergency department, ICU – intensive care unit, ANZROD – Australia New Zealand risk of death. ECMO – extracorporeal membrane oxygenation |                                |                             |                  |                                 |                             |                  |

**Supplementary Table 3b:** Baseline characteristics of patients with and without Persistent critical illness (PerCI), for clinical frailty scale (CFS) categories CFS-5-6 and CFS-7-8.

| Variable                                                                                                                                                                                                                                                                                                                                        | CFS-5-6 (n=299)                |                            |                  | CFS-7-8 (n=67)                |                            |                  |
|-------------------------------------------------------------------------------------------------------------------------------------------------------------------------------------------------------------------------------------------------------------------------------------------------------------------------------------------------|--------------------------------|----------------------------|------------------|-------------------------------|----------------------------|------------------|
|                                                                                                                                                                                                                                                                                                                                                 | Patients without PerCI (n=219) | Patients with PerCI (n=80) | p-value          | Patients without PerCI (n=54) | Patients with PerCI (n=13) | p-value          |
| Male sex, n (%)                                                                                                                                                                                                                                                                                                                                 | 105 (47.9%)                    | 50 (62.5%)                 | <b>0.026</b>     | 36 (66.7%)                    | 11 (84.6%)                 | 0.20             |
| Indigenous status, n (%)                                                                                                                                                                                                                                                                                                                        | 1 (0.5%)                       | 0 (0)                      | 0.75             | 4 (7.4%)                      | 0 (0)                      | 0.31             |
| Age, (years), median (IQR)                                                                                                                                                                                                                                                                                                                      | 72.8 (64.5, 81.6)              | 68.3 (58.0, 75.4)          | <b>&lt;0.001</b> | 68.7 (55.8, 78.5)             | 62.1 (52.1, 70.3)          | 0.20             |
| <b>Hospital admission source, n (%)</b>                                                                                                                                                                                                                                                                                                         |                                |                            |                  |                               |                            |                  |
| - Home                                                                                                                                                                                                                                                                                                                                          | 185 (84.5%)                    | 48 (60.0%)                 | <b>&lt;0.001</b> | 41 (75.9%)                    | 6 (46.2%)                  | <b>0.003</b>     |
| - Other acute hospital                                                                                                                                                                                                                                                                                                                          | 27 (12.3%)                     | 29 (36.4%)                 |                  | 8 (14.9%)                     | 7 (53.9%)                  |                  |
| - Nursing home or chronic care                                                                                                                                                                                                                                                                                                                  | 7 (3.2%)                       | 2 (2.5%)                   |                  | 4 (7.4%)                      | 0 (0)                      |                  |
| - Rehabilitation                                                                                                                                                                                                                                                                                                                                | 0 (0)                          | 0 (0)                      |                  | 1 (1.9%)                      | 0 (0)                      |                  |
| - Missing                                                                                                                                                                                                                                                                                                                                       | 0 (0)                          | 1 (1.3%)                   |                  | 0 (0)                         | 0 (0)                      |                  |
| <b>ICU admission source, n (%)</b>                                                                                                                                                                                                                                                                                                              |                                |                            |                  |                               |                            |                  |
| - Emergency department (ED)                                                                                                                                                                                                                                                                                                                     | 99 (45.2%)                     | 21 (26.3%)                 | <b>&lt;0.001</b> | 24 (44.4%)                    | 2 (15.4%)                  | <b>0.018</b>     |
| - Ward                                                                                                                                                                                                                                                                                                                                          | 111 (50.7%)                    | 35 (43.8%)                 |                  | 23 (42.6%)                    | 5 (38.5%)                  |                  |
| - Other hospital (ED and ICU)                                                                                                                                                                                                                                                                                                                   | 8 (3.6%)                       | 24 (30.1%)                 |                  | 6 (11.1%)                     | 6 (46.2%)                  |                  |
| - Operating theatre / Recovery                                                                                                                                                                                                                                                                                                                  | 0 (0)                          | 0 (0)                      |                  | 0 (0)                         | 0 (0)                      |                  |
| - Direct admit                                                                                                                                                                                                                                                                                                                                  | 1 (0.5%)                       | 0 (0)                      |                  | 1 (1.9%)                      | 0 (0)                      |                  |
| <b>Documented co-morbidities, n (%)</b>                                                                                                                                                                                                                                                                                                         |                                |                            |                  |                               |                            |                  |
| - Chronic respiratory condition                                                                                                                                                                                                                                                                                                                 | 48 (21.9%)                     | 9 (11.3%)                  | <b>0.038</b>     | 18 (33.3%)                    | 4 (30.8%)                  | 0.86             |
| - Chronic CVS condition                                                                                                                                                                                                                                                                                                                         | 45 (20.5%)                     | 7 (8.8%)                   | <b>0.017</b>     | 15 (27.8%)                    | 1 (7.7%)                   | 0.13             |
| - Chronic renal failure                                                                                                                                                                                                                                                                                                                         | 24 (11.0%)                     | 2 (2.5%)                   | <b>0.022</b>     | 4 (7.4%)                      | 0 (0)                      | 0.31             |
| - Chronic liver disease                                                                                                                                                                                                                                                                                                                         | 5 (2.3%)                       | 2 (2.5%)                   | 0.91             | 2 (3.7%)                      | 0 (0)                      | 0.48             |
| - Diabetes mellitus                                                                                                                                                                                                                                                                                                                             | 97 (45.8%)                     | 34 (43.6%)                 | 0.74             | 22 (41.5%)                    | 1 (7.7%)                   | <b>0.022</b>     |
| - Immune suppressive therapy                                                                                                                                                                                                                                                                                                                    | 25 (11.4%)                     | 9 (11.3%)                  | 0.97             | 5 (9.3%)                      | 1 (7.7%)                   | <b>0.040</b>     |
| - Lymphoma                                                                                                                                                                                                                                                                                                                                      | 3 (1.4%)                       | 1 (1.3%)                   | 0.94             | 0 (0)                         | 1 (7.7%)                   | 0.62             |
| - Leukaemia                                                                                                                                                                                                                                                                                                                                     | 6 (2.7%)                       | 2 (2.5%)                   | 0.91             | 3 (5.6%)                      | 0 (0)                      | 0.39             |
| - Metastatic cancer                                                                                                                                                                                                                                                                                                                             | 7 (3.2%)                       | 1 (1.3%)                   | 0.36             | 2 (3.7%)                      | 1 (7.7%)                   | 0.53             |
| - Obese (BMI $\geq$ 30 kg.m <sup>2</sup> )                                                                                                                                                                                                                                                                                                      | 55 (25.1%)                     | 32 (40.0%)                 | <b>0.028</b>     | 19 (35.2%)                    | 7 (53.8%)                  | 0.41             |
| - Delirium                                                                                                                                                                                                                                                                                                                                      | 23 (10.5%)                     | 18 (22.5%)                 | <b>0.006</b>     | 7 (13.0%)                     | 3 (23.1%)                  | 0.50             |
| - Pregnancy status                                                                                                                                                                                                                                                                                                                              | 0 (0)                          | 0 (0)                      | -                | 0 (0)                         | 0 (0)                      | -                |
| Pre-ICU (days) (median [IQR])                                                                                                                                                                                                                                                                                                                   | 17.9 (6.4, 75.9)               | 5.5 (0.1, 69.4)            | <b>&lt;0.001</b> | 15.6 (5.5, 88.9)              | 13.6 (0.1, 61.6)           | 0.20             |
| ICU Discharge delay                                                                                                                                                                                                                                                                                                                             | 4.2 (1.3, 8.8)                 | 4.9 (1.9, 9.9)             | 0.57             | 4.8 (2.0, 11.5)               | 0 (0, 2.9)                 | <b>0.006</b>     |
| <b>Organ failure scores</b>                                                                                                                                                                                                                                                                                                                     |                                |                            |                  |                               |                            |                  |
| - APACHE III (mean [SD])                                                                                                                                                                                                                                                                                                                        | 62.1 (20.6)                    | 62.8 (20.3)                | 0.61             | 62.5 (24.0)                   | 66.5 (26.8)                | 0.80             |
| - ANZROD (%) (mean [SD])                                                                                                                                                                                                                                                                                                                        | 20.1 (18.4)                    | 16.4 (14.6)                | 0.10             | 23.8 (24.0)                   | 19.6 (17.3)                | 0.86             |
| ICU admission post MET call, n (%)                                                                                                                                                                                                                                                                                                              | 91 (41.6%)                     | 25 (32.1%)                 | 0.14             | 18 (33.3%)                    | 5 (38.5%)                  | 0.73             |
| Treatment limitations                                                                                                                                                                                                                                                                                                                           | 94 (43.0%)                     | 11 (13.8%)                 | <b>&lt;0.001</b> | 30 (55.6%)                    | 2 (14.4%)                  | <b>0.016</b>     |
| Cardiac arrest, n (%)                                                                                                                                                                                                                                                                                                                           | 0 (0)                          | 0 (0)                      | -                | 1 (1.9%)                      | 1 (7.7%)                   | 0.54             |
| <b>ICU Supports, n (%)</b>                                                                                                                                                                                                                                                                                                                      |                                |                            |                  |                               |                            |                  |
| Mechanical ventilation                                                                                                                                                                                                                                                                                                                          | 37/213 (17.4%)                 | 61/80 (76.3%)              | <b>&lt;0.001</b> | 14/53 (26.4%)                 | 12/13 (92.3%)              | <b>&lt;0.001</b> |
| Non-invasive ventilation                                                                                                                                                                                                                                                                                                                        | 102/213 (47.9%)                | 38/77 (49.4%)              | 0.83             | 27/54 (50.0%)                 | 2/13 (15.4%)               | <b>0.024</b>     |
| Vasopressor and inotropes                                                                                                                                                                                                                                                                                                                       | 48/214 (22.4%)                 | 58/80 (72.5%)              | <b>&lt;0.001</b> | 17/53 (32.1%)                 | 11/13 (84.6%)              | <b>&lt;0.001</b> |
| Renal replacement therapy                                                                                                                                                                                                                                                                                                                       | 9/213 (4.2%)                   | 8/77 (10.4%)               | <b>0.048</b>     | 1/53 (1.9%)                   | 3/413 (23.1%)              | <b>0.004</b>     |
| ECMO                                                                                                                                                                                                                                                                                                                                            | 0/213 (0)                      | 2/77 (2.6%)                | <b>0.018</b>     | 0 (0)                         | 0 (0)                      | -                |
| Tracheostomy                                                                                                                                                                                                                                                                                                                                    | 2/213 (0.9%)                   | 11/77 (14.3%)              | <b>&lt;0.001</b> | 0 (0)                         | 1/13 (7.7%)                | <b>0.042</b>     |
| CFS – clinical frailty scale, SD – standard deviation, IQR. – interquartile range, BMI – body mass index, MET – medical emergency team, APACHE - Acute Physiology and Chronic Health Evaluation, ED – emergency department, ICU – intensive care unit, ANZROD – Australia New Zealand risk of death. ECMO – extracorporeal membrane oxygenation |                                |                            |                  |                               |                            |                  |

**Supplementary Table 4:** Adjusted odds of hospital mortality in patients with and without persistent critical illness. The graphical version is presented in Figure 1.

| Predictor                                                                                | Patients without Persistent Critical illness |              | Patients with Persistent Critical illness |              |
|------------------------------------------------------------------------------------------|----------------------------------------------|--------------|-------------------------------------------|--------------|
|                                                                                          | OR (95% CI)                                  | p-value      | OR (95% CI)                               | p-value      |
| <b>Logistic Regression Model 1 – Frailty assessed using CFS categories</b>               |                                              |              |                                           |              |
| CFS 1-2                                                                                  | Reference                                    |              | Reference                                 |              |
| CFS 3-4                                                                                  | 3.25 (1.86-5.66)                             | <0.001       | 2.09 (1.44-3.04)                          | <0.001       |
| CFS 5-6                                                                                  | 5.54 (2.88-10.66)                            | <0.001       | 1.87 (1.03-3.40)                          | <b>0.041</b> |
| CFS 7-8                                                                                  | 11.02 (4.52-26.85)                           | <0.001       | 7.01 (1.94-25.26)                         | <b>0.003</b> |
| Male sex                                                                                 | 1.77 (1.20-2.59)                             | <0.001       | 1.31 (0.93-1.85)                          | 0.12         |
| ANZROD                                                                                   | 1.08 (1.07-1.10)                             | <0.001       | 1.05 (1.04-1.07)                          | <0.001       |
| <b>Logistic Regression Model 2 – Frailty assessed using CFS as a continuous variable</b> |                                              |              |                                           |              |
| CFS                                                                                      | 1.46 (1.29-1.64)                             | <0.001       | 1.30 (1.14-1.49)                          | <0.001       |
| ANZROD                                                                                   | 1.08 (1.07-1.10)                             | <0.001       | 1.05 (1.04-1.07)                          | <0.001       |
| Male sex                                                                                 | 1.82 (1.24-2.67)                             | <b>0.002</b> | 1.32 (0.94-1.86)                          | 0.11         |
| CFS = clinical frailty scale, ANZROD = Australia and New Zealand risk of death           |                                              |              |                                           |              |

**Supplementary Figure 1:** Flow diagram demonstrating patient inclusion.

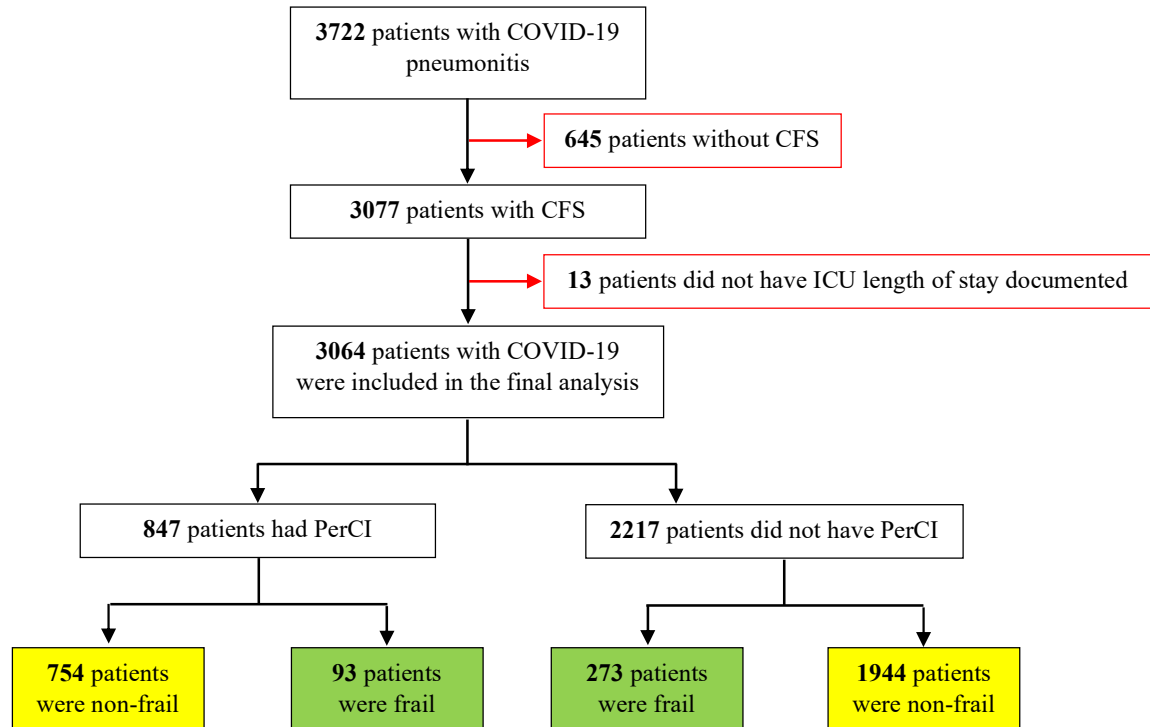

CFS – clinical frailty scale, PerCI - Persistent critical illness  
Non-frail (CFS 1-4), Frail (CFS 5-8)

**Supplementary Figure 2:** The relationship between frailty and mortality in those with and without PerCI, before and after adjusting for ANZROD and male sex, using AUROC (95%CI). The Clinical Frailty Scale (CFS) was treated as a continuous variable.

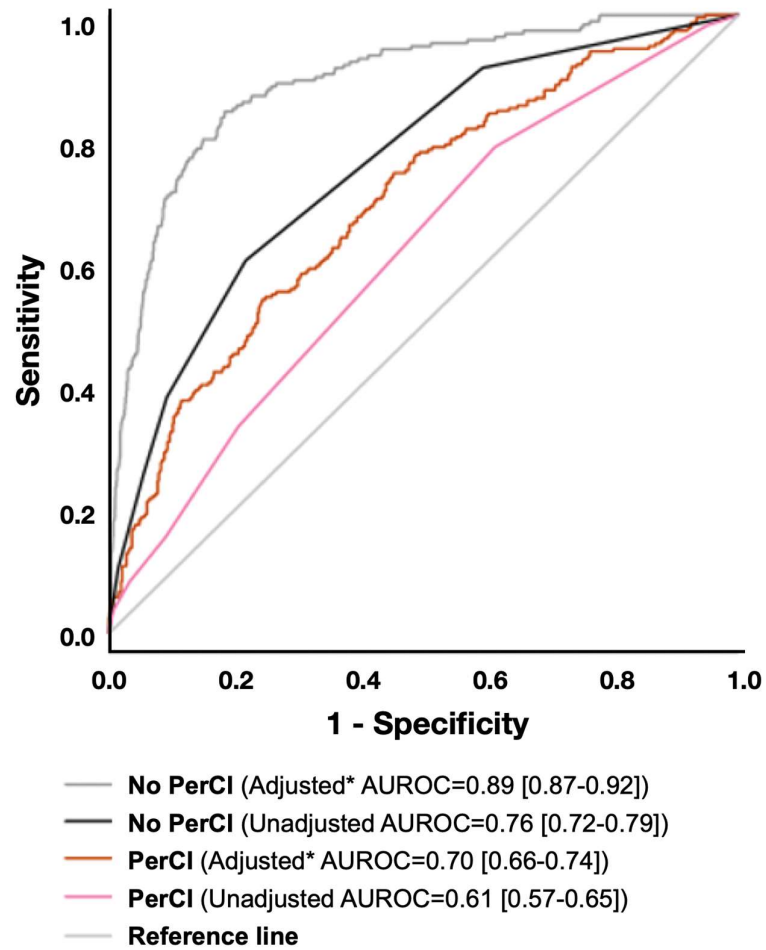

Comparison between unadjusted and adjusted PerCI vs. no PerCI are both  $<0.001$   
\* Adjusted CFS for ANZROD and male sex

**Supplementary Figure 3:** Proportion of patients with ICU length of stays and those who died in hospital, based on CFS categories. \*Error bars are standard errors of the mean.

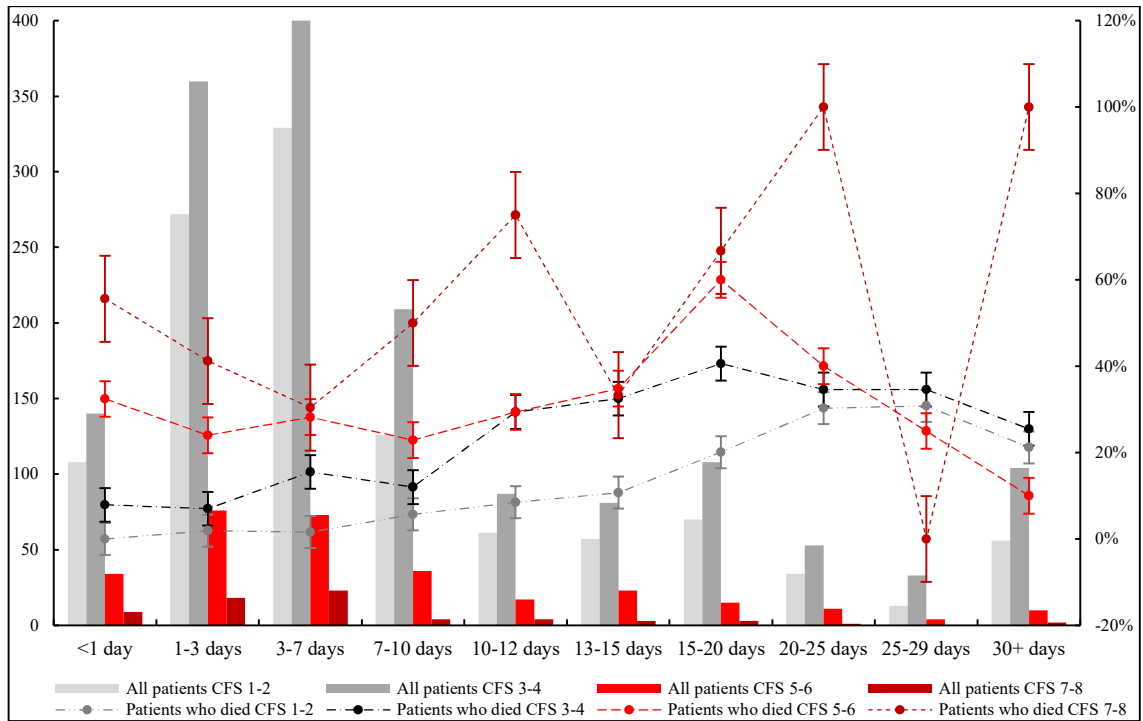

Supplement: Supplementary file [file media-1.pdf]
